# Supplementary material
Source: HighWire-hosted journal article supplement (https://diabetes.diabetesjournals.org/content/suppl/2007/02/09/db06-0880)

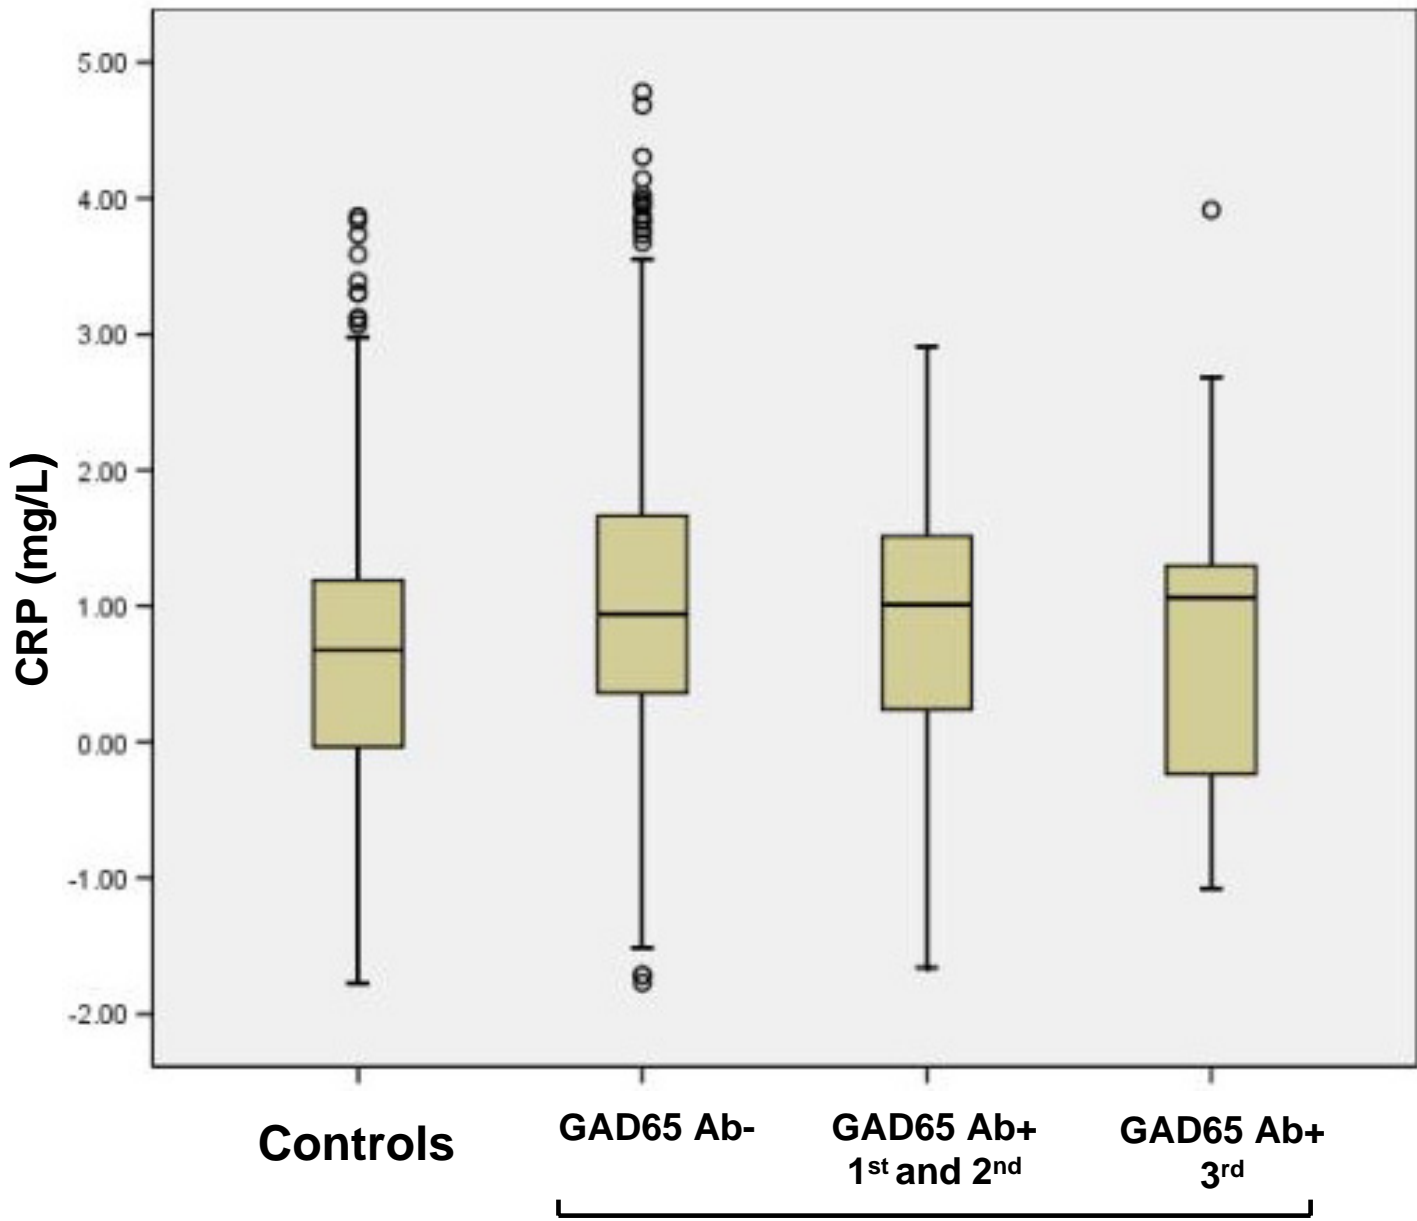

Diabetics

Figure 1

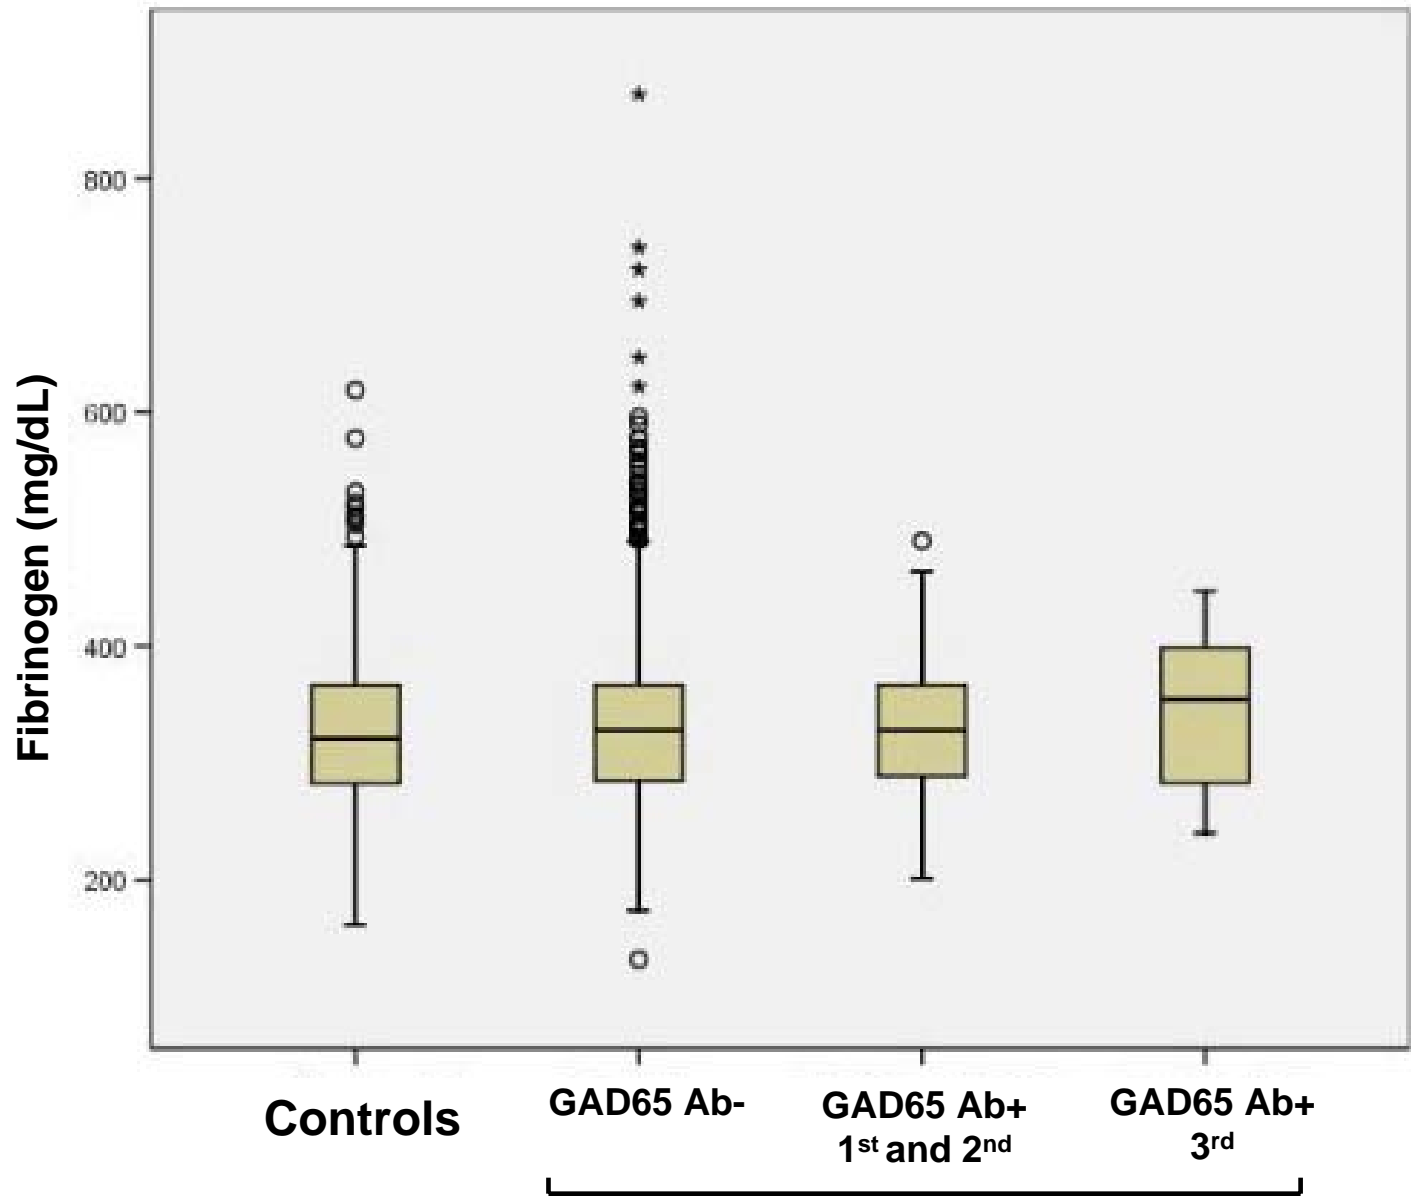

Diabetics

Figure 2

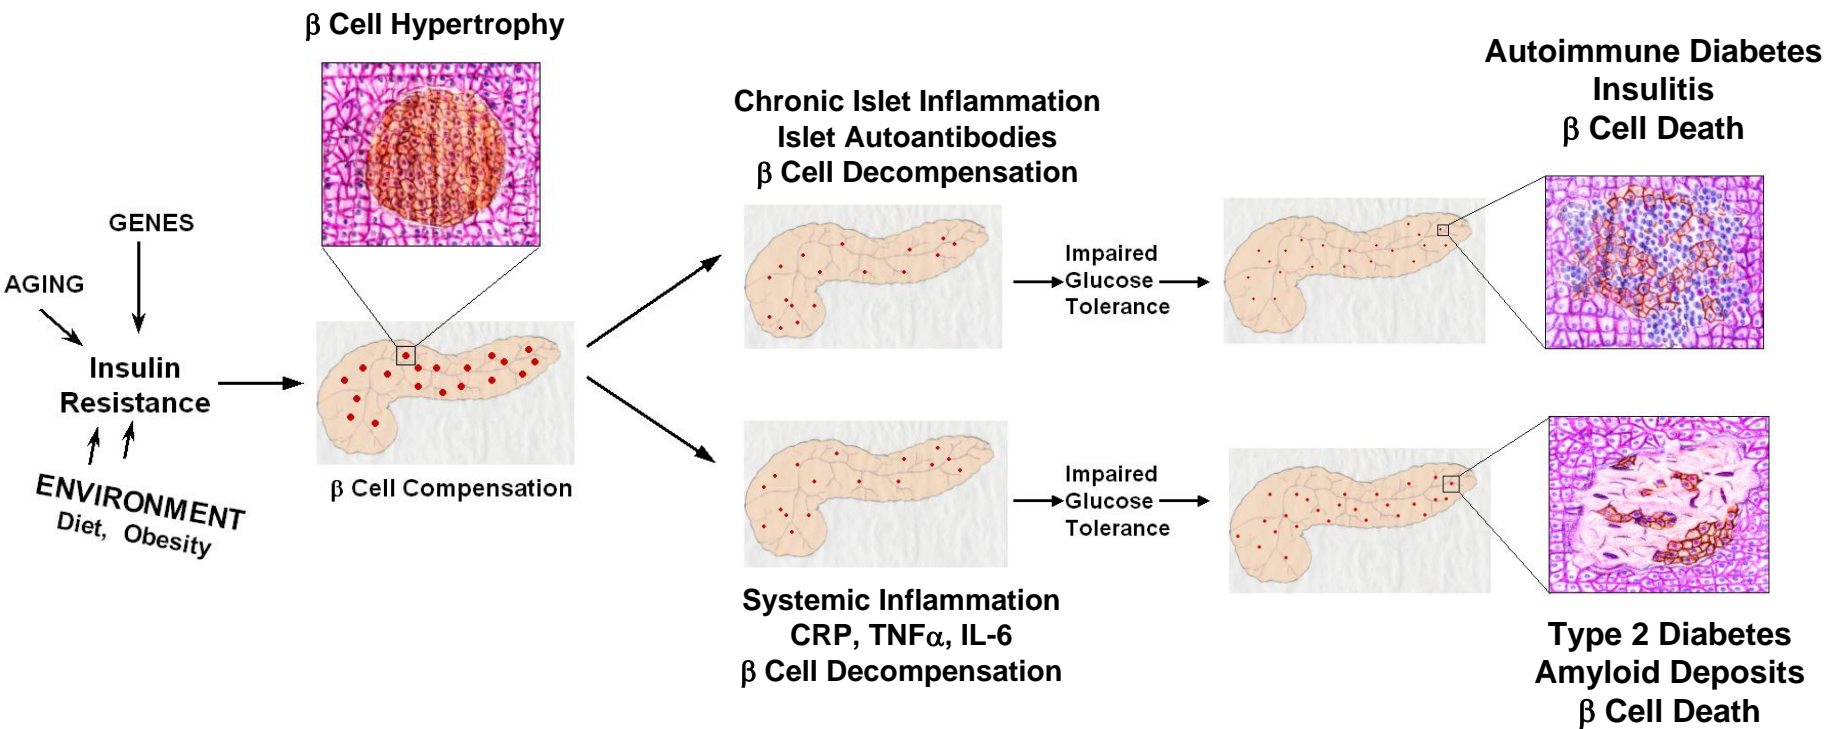

**Figure 3**

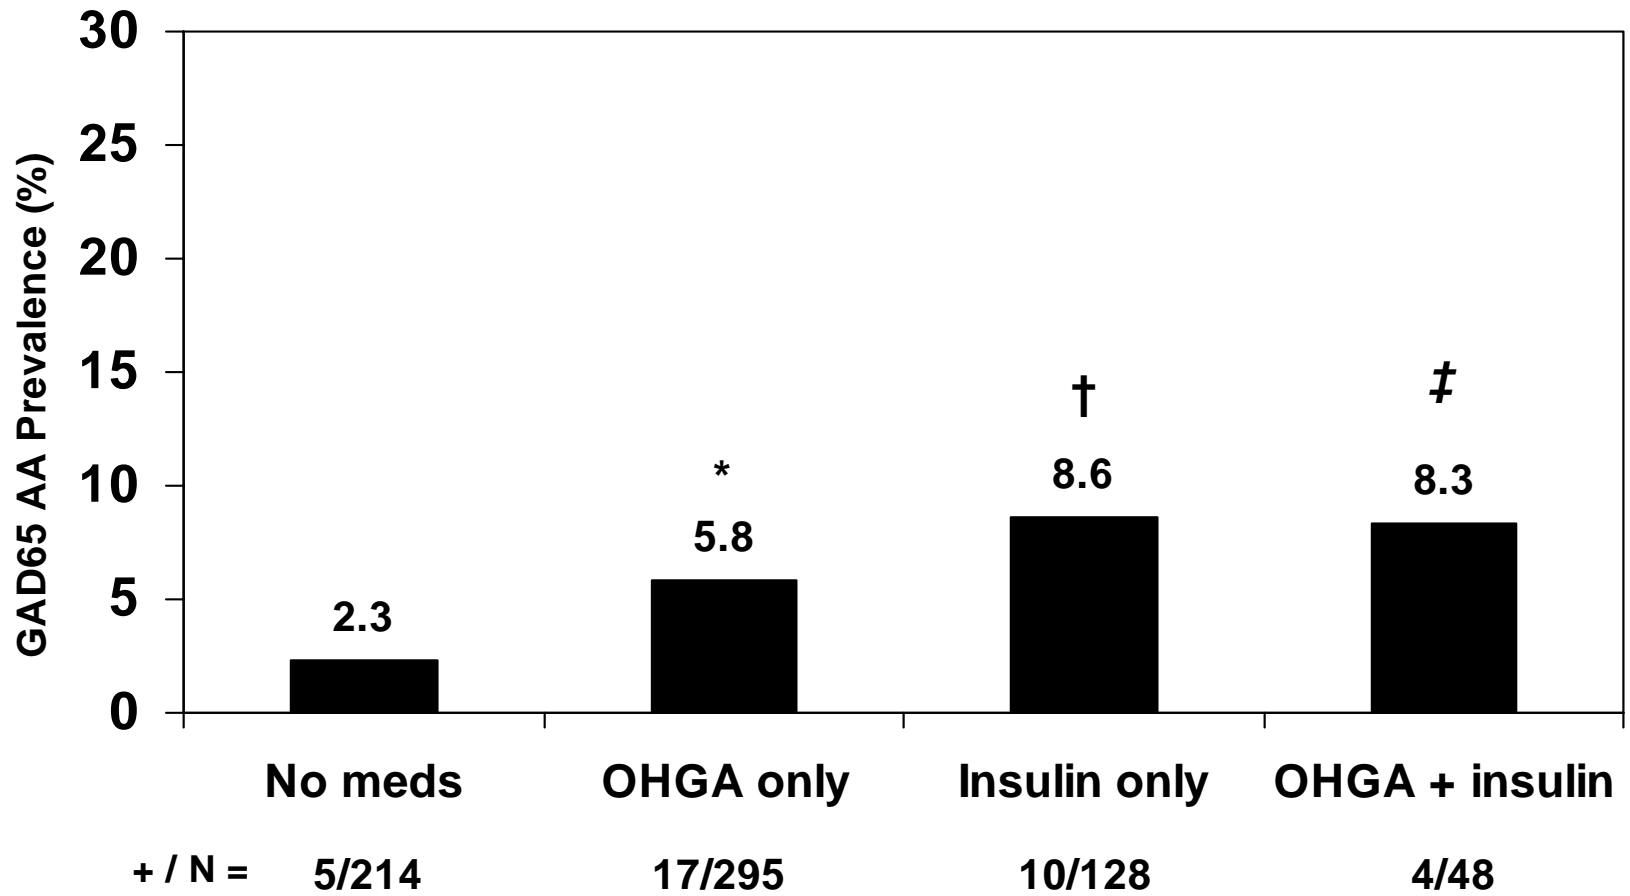

**Figure 4**

Supplement: DB06-0880.Figures.pdf [file DB06-0880.Figures.pdf]
